# Supplementary material
Source: MDPI journal article supplement (https://www.mdpi.com/2077-0472/12/9/1488)
Supplement: s1 [file s1]

GAAGGCGGGCTGGCACCTCCCGGGGTGGCCAGCCTTGCTGAATTATTCCACCCGTGTCTTTTTCGCTACTTCTTGTTTCTTGGTGGGCTCGCCCACCACAAGGACCAACCCATA  
AACCTTTTGTCAATGGCAATCAGCGTCAGTAACAATGTAATAATTTACAACCTTTCAACAACGGATCTCTTGGTTCTGGCATCGATGAAGAACGCAGCGAAATGCGATAAGTA  
GTGTGAATTGCAGAATTCAGTGAATCATCGAATCTTTGAACGCACATTGCGCCCTTTGGTATTCCAAAGGGCATGCCTGTTCGAGCGTCATTTGTACCCTCAAGCTTTGCTTGG  
TGTGGGCGTCTTTTGTCTCCCTTTCGCGGAGACTCGCCTTAAAGTCATTGGCAGCCGGCCTACTGGTTTCGGAGCGCAGCACAAGTCGCGCTCTCTTCCAGCCCCAAGGTCT  
AGCATCCACCAAGCCTTTTTCACCTTTGACCTCGGATCAGGTAGGGATACCCGCTGAACCTTAAGCATATCAATAAGCGGAGGAAAAGAAACCAACAGGGATTGCCCTA  
GTAACGGCGAGTGAAGCGGCAACAGCTCAAATTTGAAATCTGGCTCTTTTAGAGTCCGAGTTGTACTTTGCAGAGGGCGCTTTGGCTTTGGCAGCGGTCCAAGTTCCTTGGA  
CAGGACGTCACAGAGGGTGAGAATCCCGTACGTGGTCGCTGGCTATTGCCGTGTAAAGCCCTTCGACGAGTCGAGTTGTTTGGGAATGCAGCTCTAAATGGGAGGTACATT  
TCTTCTAAAGCTAAATATTGGCCAGAGACCGATAGCGCACAAGTAGAGTGATCGAAAGATGAAAAGCACTTTGGAAAGAGAGTCAAACAGCACGTGAAATTGTTGAAAGG  
GAAGCGCTTCGAGCCAGACTTGCTTGCAGTTGCTCATCCGGGCTTTTTTGGCCGGTGCACCTTCTGTAGGCAGGCCAGCATCAGTTTGGGCGGTAGGATAAAGGTCTCTGTCA  
CGTACCTCCTTTCGGGGAGGCCTTATAGGGGAGGCGACATACTACCAGCCTGGACTGAGGTCCGCGCATCTGCTAGGATGCTGGCGTAATGGCTGTAAGCGGCCCGTCTTGA  
AACACGGACCAAGGAGTCTAACATCTATGCGAGTGTGTTGGGTGTCAAGCCCCGAGCGCGTAATGAAAGTGAACGGAGGTGGGAACCCGCAAGGGTGCACCATCGACCGATC  
CTGATGTCTTCGGAAGGATTTGAGTAAGAGCATGGCTGTTGGGACCCGAAAGATGGTGAACATGCTTGAATAGGGTGAAGCCAGAGGAACTCTGTTGGAGGCTCGCAGC  
GGTCTGACGTGCAATCGATCGTCAAATTTGGGCATAGGGGCGAAAGACTAATCGAACTATCTAGTAGCTGGT

**Figure S1.** Nucleotide sequence of the amplified DNA fragment from the determined using the ITS5–LR5 primer system and covering the intergenic region and genes encoding 5.8S RNA and (partially) 28S RNA.

**Table S1.** Results of the BLAST analysis of the DNA fragment obtained from the *Alternaria solani* isolate.

| Description                                                                                                                                                                                                                                                                     | Max Score | Total Score | Query Cover | E value | Per. Ident | Accession                  |
|---------------------------------------------------------------------------------------------------------------------------------------------------------------------------------------------------------------------------------------------------------------------------------|-----------|-------------|-------------|---------|------------|----------------------------|
| <i>Alternaria solani</i> isolate NL03003 chromosome 2, complete sequence                                                                                                                                                                                                        | 2623      | 31458       | 100%        | 0.0     | 99.93%     | <a href="#">CP022025.1</a> |
| <i>Alternaria solani</i> isolate altNL03003/CBS 143772 small subunit ribosomal RNA gene, partial sequence; internal transcribed spacer 1, 5.8S ribosomal RNA gene, and internal transcribed spacer 2, complete sequence; and large subunit ribosomal RNA gene, partial sequence | 2584      | 2584        | 98%         | 0.0     | 99.93%     | <a href="#">OL865410.1</a> |
| <i>Alternaria alternata</i> strain SRC1lrK2f small subunit ribosomal RNA gene, partial sequence; internal transcribed spacer 1, 5.8S ribosomal RNA gene, and internal transcribed spacer 2, complete sequence; and large subunit ribosomal RNA gene, partial sequence           | 2385      | 2385        | 100%        | 0.0     | 97.05%     | <a href="#">OM337556.1</a> |
| <i>Alternaria alternata</i> strain Z7 chromosome 7, complete sequence                                                                                                                                                                                                           | 2385      | 28483       | 100%        | 0.0     | 97.05%     | <a href="#">CP061881.1</a> |
| <i>Alternaria malorum</i> var. <i>polymorpha</i> strain STE-U 4570 internal transcribed spacer 1, partial sequence; 5.8S ribosomal RNA gene and internal transcribed spacer 2, complete sequence; and 28S ribosomal RNA gene, partial sequence                                  | 2359      | 2359        | 98%         | 0.0     | 97.21%     | <a href="#">AY251080.2</a> |
| <i>Cladosporium malorum</i> strain STE-U 4571 18S ribosomal RNA gene, partial sequence; internal transcribed spacer 1, 5.8S ribosomal RNA gene, and internal transcribed spacer 2, complete sequence; and 28S ribosomal RNA gene, partial sequence                              | 2355      | 2355        | 98%         | 0.0     | 97.21%     | <a href="#">AY251081.2</a> |
| <i>Alternaria thalictrogena</i> strain CPC 13410 18S ribosomal RNA gene, partial sequence; internal transcribed spacer 1, 5.8S ribosomal RNA gene, and internal transcribed spacer 2, complete sequence; and 28S ribosomal RNA gene, partial sequence                           | 2340      | 2340        | 98%         | 0.0     | 96.81%     | <a href="#">EU040211.1</a> |

|                                                                                                                                                                                                                                          |      |      |     |     |        |                            |
|------------------------------------------------------------------------------------------------------------------------------------------------------------------------------------------------------------------------------------------|------|------|-----|-----|--------|----------------------------|
| <i>Cladosporium malorum</i> strain STE-U 4572 internal transcribed spacer 1, partial sequence; 5.8S ribosomal RNA gene and internal transcribed spacer 2, complete sequence; and 28S ribosomal RNA gene, partial sequence                | 2333 | 2333 | 98% | 0.0 | 96.92% | <a href="#">AY251079.2</a> |
| <i>Alternaria tenuissima</i> voucher culture Y311A internal transcribed spacer 1, partial sequence; 5.8S ribosomal RNA gene and internal transcribed spacer 2, complete sequence; and large subunit ribosomal RNA gene, partial sequence | 2324 | 2324 | 97% | 0.0 | 96.98% | <a href="#">MW791881.1</a> |
| <i>Alternaria tenuissima</i> strain CZ041 internal transcribed spacer 1, partial sequence; 5.8S ribosomal RNA gene and internal transcribed spacer 2, complete sequence; and 28S ribosomal RNA gene, partial sequence                    | 2324 | 2324 | 97% | 0.0 | 97.05% | <a href="#">FJ755190.1</a> |
| <i>Alternaria tenuissima</i> strain CZ305B internal transcribed spacer 1, partial sequence; 5.8S ribosomal RNA gene and internal transcribed spacer 2, complete sequence; and 28S ribosomal RNA gene, partial sequence                   | 2318 | 2318 | 97% | 0.0 | 96.97% | <a href="#">FJ755192.1</a> |
